# Supplementary material for: Chromium(iii) in deep eutectic solvents: towards a sustainable chromium(vi)-free steel plating process
Source: Royal Society of Chemistry journal article supplement (doi:10.1039/c9gc00690g), 2019-01-01
Supplement: c9gc00690g1.pdf [file c9gc00690g1.pdf]

## Electronic Supporting Information (ESI)

Tim Verdonck,<sup>a,b</sup> Philippe Verpoort,<sup>b</sup> Joost De Strycker,<sup>b</sup> Ansbart De Cleene,<sup>b</sup>  
Dipanjana Banerjee,<sup>c,d</sup> Peter Nockemann,<sup>e</sup> Rik Van Deun,<sup>\*a</sup> and Kristof Van Hecke<sup>\*a</sup>

<sup>a</sup> Ghent University, Faculty of Sciences, Department of Chemistry, Krijgslaan 281 - S3, B-9000 Ghent, Belgium.

<sup>b</sup> OCAS NV, Pres. J.F. Kennedylaan 3, B-9060 Zelzate, Belgium.

<sup>c</sup> Department of Chemistry, KU Leuven, Celestijnenlaan 200F box 2404, 3001 Leuven, Belgium.

<sup>d</sup> Dutch-Belgian Beamline (DUBBLE), European Synchrotron Radiation Facility - 71, avenue des Martyrs, CS 40220, 38043 Grenoble Cedex 9, France.

<sup>e</sup> Queen's University Belfast - The QUILL Research Centre, School of Chemistry and Chemical Engineering, Stranmillis Road, David Keir Building, BT9 5AG, Belfast, UK.

# S1 Figures

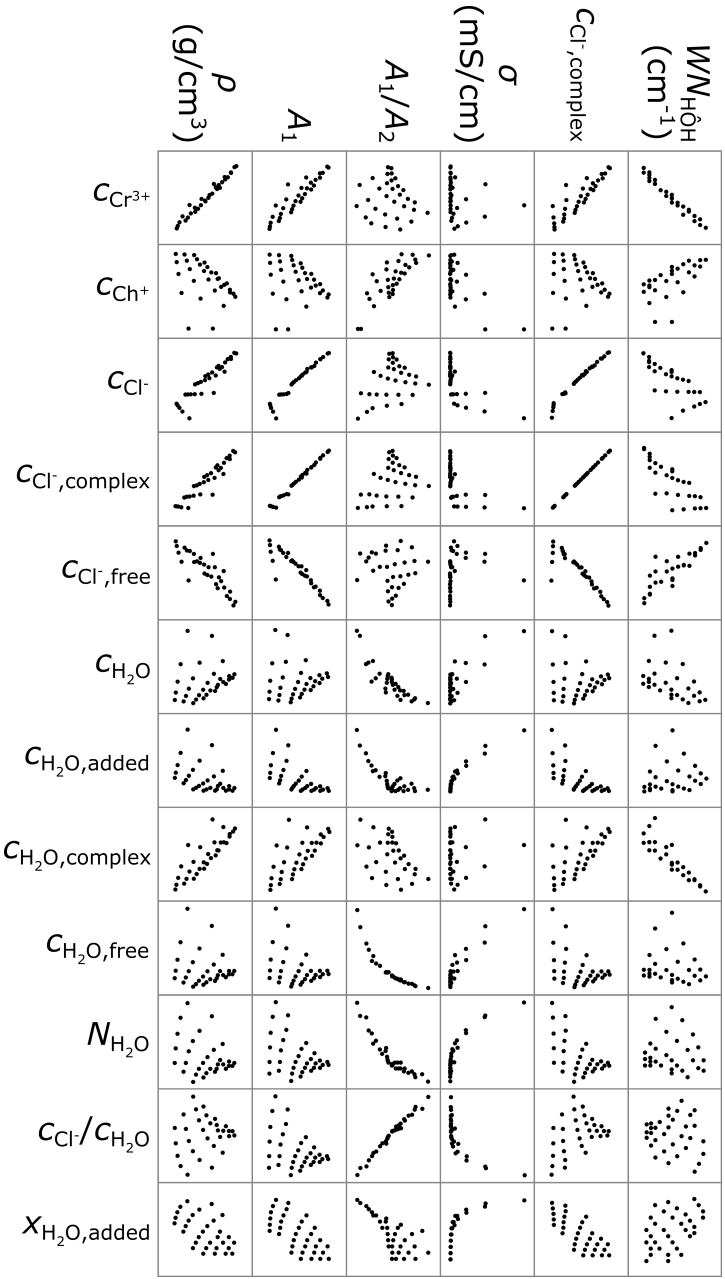

**Figure S1:** Illustration of the correlations between all values of interest. The corresponding Pearson’s r-values are presented in table S2. However, it should be considered that the Pearson’s correlation value will only indicate linear trends, non-linear (e.g. quadratic) correlations will not necessarily give high r-values. All concentrations are in mol/L.

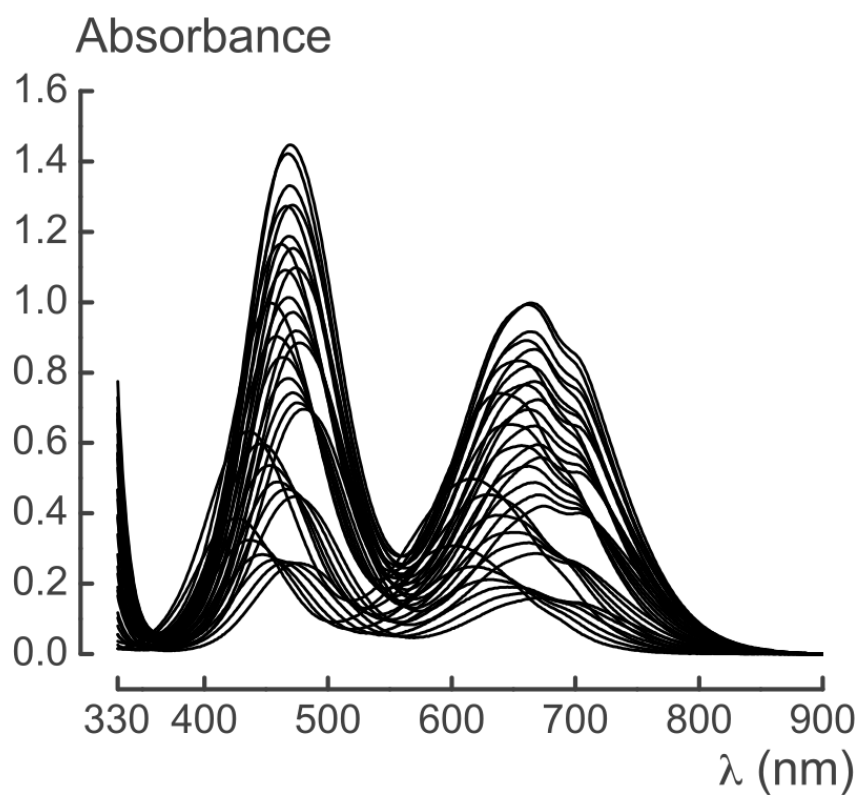

**Figure S2:** Overview of the UV/Vis spectra of 33 different DES-water compositions. Each spectrum is the average of the measurement of at least 3 DES-water mixtures with the same composition to ensure reproducibility.

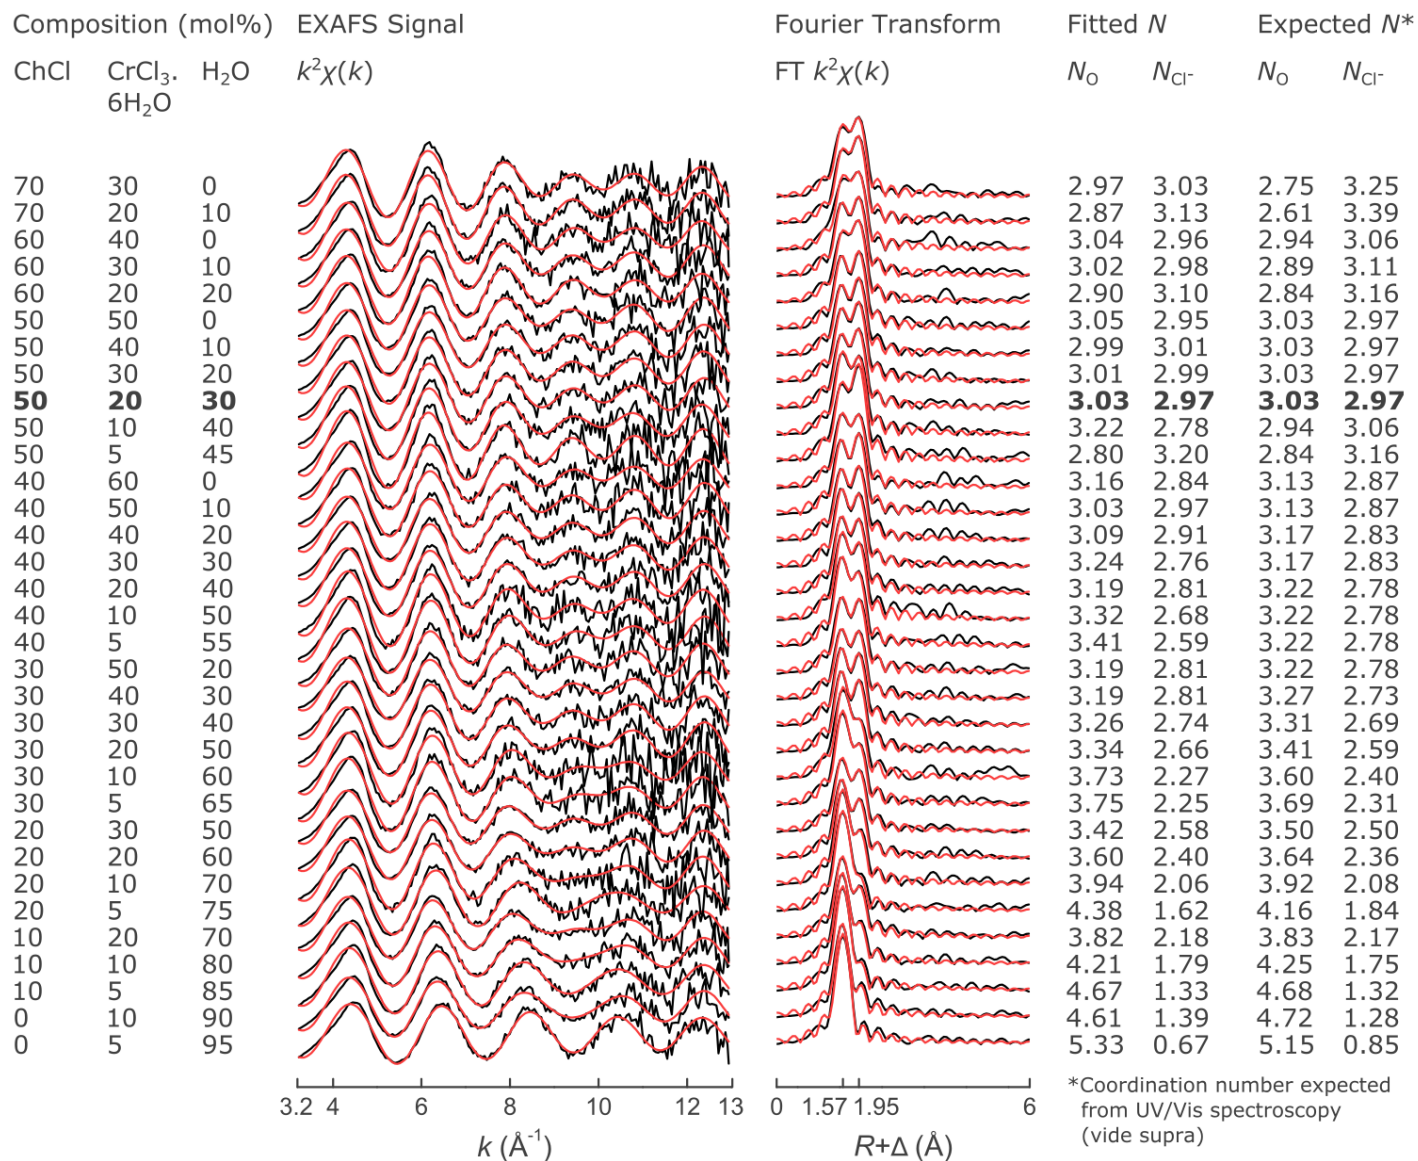

**Figure S3:** All samples studied by UV/Vis were also analyzed by the use of X-ray absorption spectroscopy. The fitted coordination numbers correspond well with the average number of oxygens and chlorides in the first coordination sphere of the complexes, calculated based on the UV/Vis spectroscopy results. Both the experimental (black) and fitted curves (red) are shown. Inherently to the EXAFS equation, the amplitude reduction factor  $S_0^2$  and the coordination numbers are 100% correlated. To solve this problem, the total coordination number of each complex was fixed to 6. Hence, one shell can be optimized as  $x$ , while the other is fixed to  $6 - x$ . However, there still exists a strong correlation between the Debye-Waller factors and these relative coordination numbers. Hence, the values indicated in bold were used as the reference EXAFS and Fourier transform (FT) spectra for the calculation of the Debye-Waller factors, while fixing the coordination numbers to those obtained by UV/Vis spectroscopy. The obtained Debye-Waller factors were then used for all other fitting procedures. The output parameters of all fits can be found in table S1.

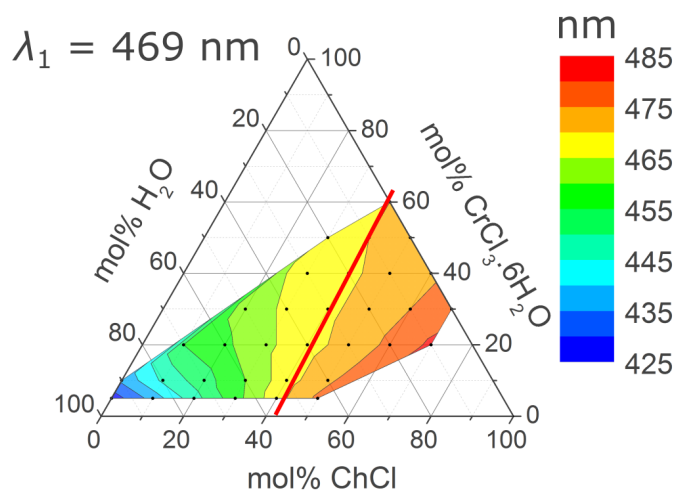

Use position in ternary diagram to obtain detailed information on concentrations and coordination chemistry from Figure 2 and 6 and on physical properties from Figure 1 and 13 (main paper)

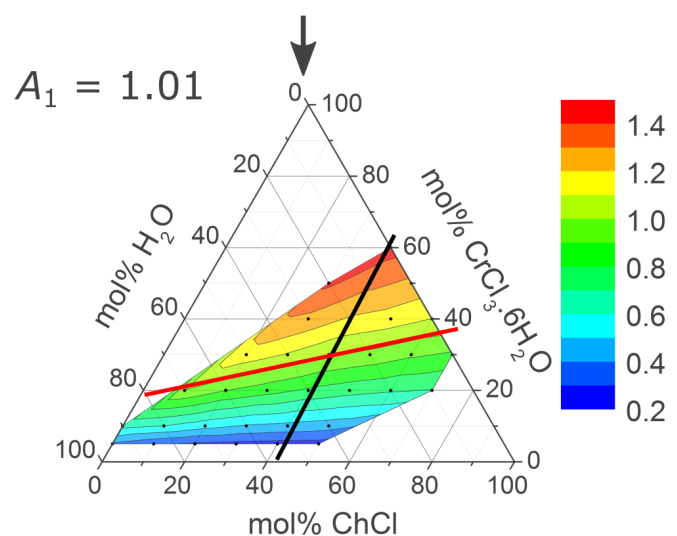

Composition:  
30 mol%  $\text{CrCl}_3 \cdot 6\text{H}_2\text{O}$   
40 mol%  $\text{ChCl}$   
30 mol%  $\text{H}_2\text{O}$

**Figure S4:** Illustration on how to use the wavelength and absorbance value of the first absorption band of an unknown DES-water mixture to determine the composition and eventually obtain a lot of information on the concentrations and properties of the liquid. In this example, the unknown sample has a  $\lambda_1$ -value of 469 nm. This value can be used to draw a line in the ternary diagram (red line). Next, in the second ternary diagram, the absorbance value of 1.01 can be used to draw another line which is intersecting with the previous one. In this way, the intersection can be used to determine the composition of the DES-water mixture, which is in this case: 30  $\text{CrCl}_3 \cdot 6\text{H}_2\text{O}$ /40  $\text{ChCl}$ /30  $\text{H}_2\text{O}$ . This composition can then be used to obtain a large range of concentrations, information on the coordination chemistry, and physical properties from the other ternary diagrams in the main paper.

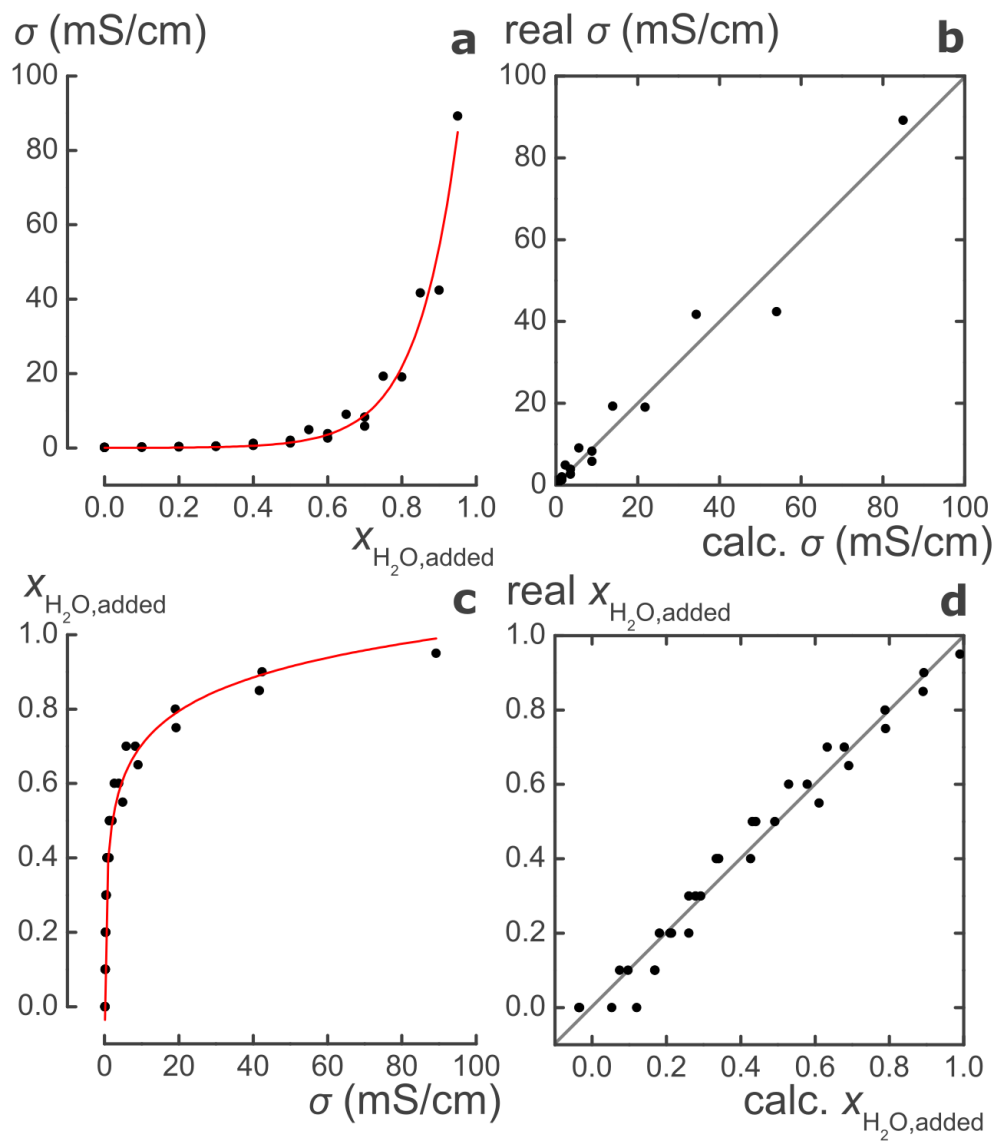

**Figure S5:** In this figure, the link between the conductivity and the mole fraction of water which was added to the DES-water mixture is studied. (a) shows the conductivity as a function of this mole fraction, which fit has an adjusted  $R^2$  value of 0.97276. The calculated results from eq. 9 are compared with the real conductivities in (b). In (c), the parameters of (a) are interchanged which fit results in an adjusted  $R^2$  value of 0.96977. The accuracy of the corresponding calculations (eq. 10) is illustrated in (d).

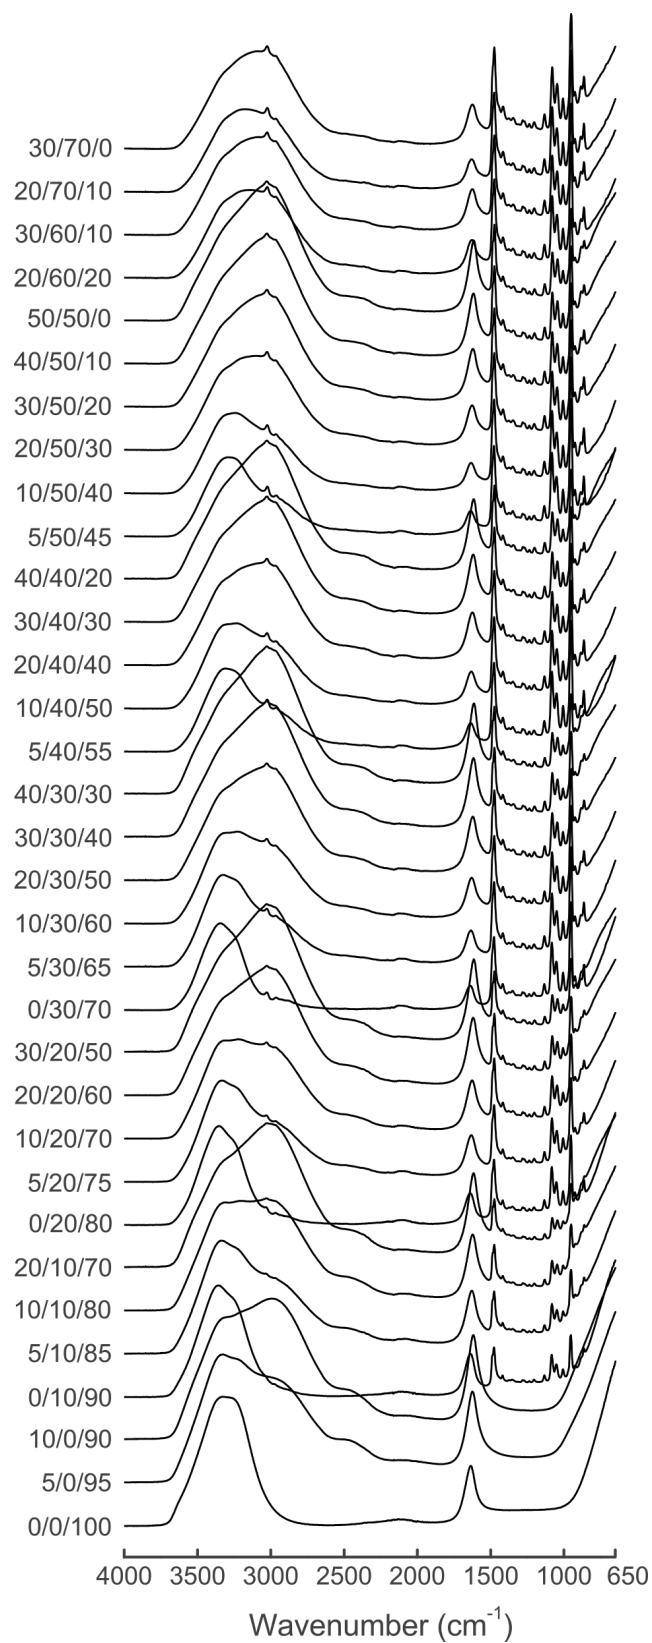

**Figure S6:** Overview of the attenuated total reflection Fourier transform infrared (ATR-FTIR) spectra for 33 different compositions. Each spectrum is an average of 4 measurements performed on 2 different samples with the same composition. The labels represent the mole percentages of the different components according to:  $x\text{CrCl}_3 \cdot 6\text{H}_2\text{O} / y\text{ChCl} / z\text{H}_2\text{O}$ .

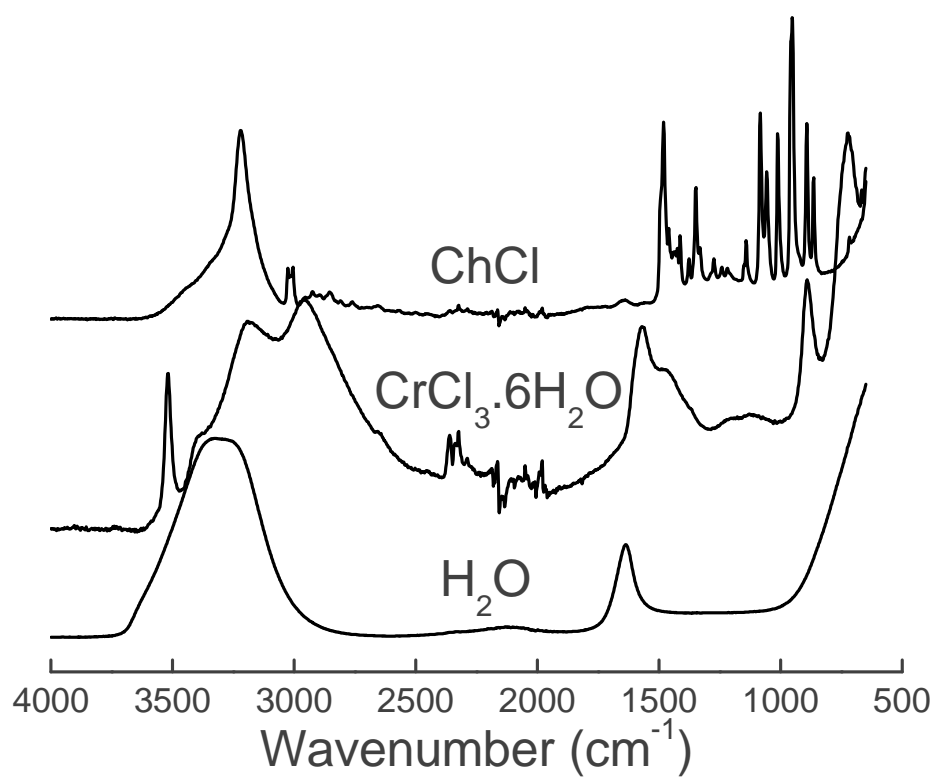

**Figure S7:** ATR-FTIR spectra of solid choline chloride, solid  $\text{CrCl}_3 \cdot 6\text{H}_2\text{O}$ , and water.



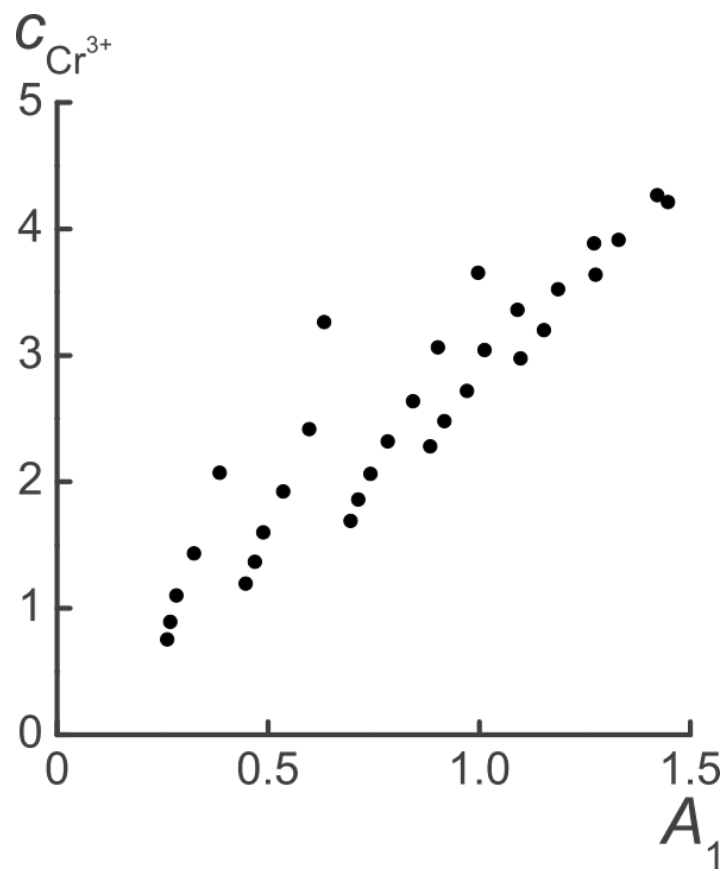

**Figure S8:** Illustration of the fact that the absorbance is not only influenced by the concentration of chromium(III), but also by its coordination chemistry. This results in the relatively low Pearson's  $r$  value of 0.931.

| Input       |        | Output                      |                          | Corrected output            |                          |
|-------------|--------|-----------------------------|--------------------------|-----------------------------|--------------------------|
| $\lambda_1$ | 472 nm | N(Cl <sup>-</sup> )         | 2.97 ligands per Cr(III) | N(Cl <sup>-</sup> )         | 2.97 ligands per Cr(III) |
| $A_1$       | 0.9715 | c(Cl <sup>-</sup> ,tot)     | 12.67 mol/L              | c(Cl <sup>-</sup> ,tot)     | 12.76 mol/L              |
| $A_2$       | 0.6481 | c(Cl <sup>-</sup> ,complex) | 8.08 mol/L               | c(Cl <sup>-</sup> ,complex) | 8.12 mol/L               |
|             |        | c(Cl <sup>-</sup> ,free)    | 4.65 mol/L               | c(Cl <sup>-</sup> ,free)    | 4.62 mol/L               |
|             |        | N(H <sub>2</sub> O)         | 3.03 ligands per Cr(III) | N(H <sub>2</sub> O)         | 3.03 ligands per Cr(III) |
|             |        | c(H <sub>2</sub> O,tot)     | 18.29 mol/L              | c(H <sub>2</sub> O,tot)     | 18.33 mol/L              |
|             |        | c(H <sub>2</sub> O,complex) | 8.25 mol/L               | c(H <sub>2</sub> O,complex) | 8.30 mol/L               |
|             |        | c(H <sub>2</sub> O,free)    | 10.04 mol/L              | c(H <sub>2</sub> O,free)    | 10.04 mol/L              |
|             |        | c(Cr <sup>3+</sup> )        | 2.72 mol/L               | c(Cr <sup>3+</sup> )        | 2.74 mol/L               |
|             |        | c(Ch <sup>+</sup> )         | 4.50 mol/L               | c(Ch <sup>+</sup> )         | 4.46 mol/L               |

  

|                                                                                          |  |
|------------------------------------------------------------------------------------------|--|
| Remarks:                                                                                 |  |
| A pathlength of 0.1 mm is required                                                       |  |
| c(Ch <sup>+</sup> ) can only be determined accurately for starting mixtures of DES-water |  |
| Larger errors can be expected from values indicated in light grey                        |  |
| For $\lambda_1$ values of 460 nm and higher, the normal output can be used               |  |
| For $\lambda_1$ values below 460 nm, the corrected output should be used                 |  |
| The colours change interactively and indicate which output can be used                   |  |

**Figure S9:** Screenshot of the tool discussed in the main paper. As an example, the  $\lambda_1$ ,  $A_1$ , and  $A_2$  values of a sample inside the boundary conditions is used. In this case, the regular output should be used. Therefore the corrected output is presented in light gray.

| Input                                                                                    |         | Output                      |                          | Corrected output            |                          |
|------------------------------------------------------------------------------------------|---------|-----------------------------|--------------------------|-----------------------------|--------------------------|
| $\lambda_1$                                                                              | 446 nm  | N(Cl <sup>-</sup> )         | 1.75 ligands per Cr(III) | N(Cl <sup>-</sup> )         | 1.75 ligands per Cr(III) |
| $A_1$                                                                                    | 0.598   | c(Cl <sup>-</sup> ,tot)     | 10.36 mol/L              | c(Cl <sup>-</sup> ,tot)     | 10.04 mol/L              |
| $A_2$                                                                                    | 0.45297 | c(Cl <sup>-</sup> ,complex) | 4.89 mol/L               | c(Cl <sup>-</sup> ,complex) | 4.40 mol/L               |
|                                                                                          |         | c(Cl <sup>-</sup> ,free)    | 5.50 mol/L               | c(Cl <sup>-</sup> ,free)    | 5.61 mol/L               |
|                                                                                          |         | N(H <sub>2</sub> O)         | 4.25 ligands per Cr(III) | N(H <sub>2</sub> O)         | 4.25 ligands per Cr(III) |
|                                                                                          |         | c(H <sub>2</sub> O,tot)     | 35.06 mol/L              | c(H <sub>2</sub> O,tot)     | 33.84 mol/L              |
|                                                                                          |         | c(H <sub>2</sub> O,complex) | 11.92 mol/L              | c(H <sub>2</sub> O,complex) | 10.70 mol/L              |
|                                                                                          |         | c(H <sub>2</sub> O,free)    | 23.14 mol/L              | c(H <sub>2</sub> O,free)    | 23.14 mol/L              |
|                                                                                          |         | c(Cr <sup>3+</sup> )        | 2.80 mol/L               | c(Cr <sup>3+</sup> )        | 2.52 mol/L               |
|                                                                                          |         | c(Ch <sup>+</sup> )         | 1.96 mol/L               | c(Ch <sup>+</sup> )         | 2.25 mol/L               |
| Remarks:                                                                                 |         |                             |                          |                             |                          |
| A pathlength of 0.1 mm is required                                                       |         |                             |                          |                             |                          |
| c(Ch <sup>+</sup> ) can only be determined accurately for starting mixtures of DES-water |         |                             |                          |                             |                          |
| Larger errors can be expected from values indicated in light grey                        |         |                             |                          |                             |                          |
| For $\lambda_1$ values of 460 nm and higher, the normal output can be used               |         |                             |                          |                             |                          |
| For $\lambda_1$ values below 460 nm, the corrected output should be used                 |         |                             |                          |                             |                          |
| The colours change interactively and indicate which output can be used                   |         |                             |                          |                             |                          |

**Figure S10:** Screenshot of the tool discussed in the main paper. As an example, the  $\lambda_1$ ,  $A_1$ , and  $A_2$  values of a sample outside the boundary conditions is used. In this case, the corrected output should be used. Therefore the regular output is presented in light gray.

## S2 Tables

**Table S1:** Detailed fitting results of the EXAFS experiment shown in fig. S3. The error values are shown in grey, underlined values were fixed during the optimisation, and the EXAFS experiment indicated in bold was used as a reference to calculate the Debye-Waller factors for the other fitting procedures. Table continues on next page.

| mol% ChCl | mol% CrCl <sub>3</sub> · 6 H <sub>2</sub> O |    | mol% H <sub>2</sub> O | $S_0^2$      | $N_O$        | $N_{Cl^-}$ | $R_O$ (Å)      | $R_{Cl^-}$ (Å) | $\sigma_O^2$ (Å <sup>2</sup> ) | $\sigma_{Cl^-}^2$ (Å <sup>2</sup> ) | $E_0$ (eV)   | $F$ (%) |
|-----------|---------------------------------------------|----|-----------------------|--------------|--------------|------------|----------------|----------------|--------------------------------|-------------------------------------|--------------|---------|
|           |                                             |    |                       |              |              |            |                |                |                                |                                     |              |         |
| 0         | 5                                           | 95 |                       | 0.52<br>0.08 | 5.33<br>0.79 | 0.67       | 1.964<br>0.003 | 2.232<br>0.013 | <u>0.0012</u>                  | <u>0.0027</u>                       | 0.49<br>0.70 | 30.82   |
| 0         | 10                                          | 90 |                       | 0.52<br>0.04 | 4.61<br>0.34 | 1.39       | 1.970<br>0.003 | 2.270<br>0.006 | <u>0.0012</u>                  | <u>0.0027</u>                       | 0.92<br>0.63 | 33.82   |
| 10        | 5                                           | 85 |                       | 0.57<br>0.04 | 4.67<br>0.35 | 1.33       | 1.971<br>0.003 | 2.257<br>0.007 | <u>0.0012</u>                  | <u>0.0027</u>                       | 0.73<br>0.65 | 32.91   |
| 10        | 10                                          | 80 |                       | 0.55<br>0.03 | 4.21<br>0.26 | 1.79       | 1.977<br>0.003 | 2.275<br>0.005 | <u>0.0012</u>                  | <u>0.0027</u>                       | 1.17<br>0.62 | 34.58   |
| 10        | 20                                          | 70 |                       | 0.53<br>0.02 | 3.82<br>0.22 | 2.18       | 1.986<br>0.004 | 2.288<br>0.004 | <u>0.0012</u>                  | <u>0.0027</u>                       | 1.72<br>0.62 | 35.91   |
| 20        | 5                                           | 75 |                       | 0.58<br>0.04 | 4.38<br>0.32 | 1.62       | 1.977<br>0.004 | 2.262<br>0.006 | <u>0.0012</u>                  | <u>0.0027</u>                       | 0.41<br>0.74 | 37.82   |
| 20        | 10                                          | 70 |                       | 0.60<br>0.04 | 3.94<br>0.30 | 2.06       | 1.986<br>0.005 | 2.287<br>0.006 | <u>0.0012</u>                  | <u>0.0027</u>                       | 2.20<br>0.81 | 44.83   |
| 20        | 20                                          | 60 |                       | 0.54<br>0.02 | 3.60<br>0.19 | 2.40       | 1.982<br>0.003 | 2.288<br>0.004 | <u>0.0012</u>                  | <u>0.0027</u>                       | 1.24<br>0.59 | 34.42   |
| 20        | 30                                          | 50 |                       | 0.53<br>0.02 | 3.42<br>0.17 | 2.58       | 1.990<br>0.004 | 2.293<br>0.003 | <u>0.0012</u>                  | <u>0.0027</u>                       | 1.79<br>0.56 | 32.96   |
| 30        | 5                                           | 65 |                       | 0.63<br>0.03 | 3.75<br>0.26 | 2.25       | 1.991<br>0.004 | 2.288<br>0.005 | <u>0.0012</u>                  | <u>0.0027</u>                       | 1.77<br>0.75 | 41.81   |
| 30        | 10                                          | 60 |                       | 0.60<br>0.05 | 3.73<br>0.39 | 2.27       | 1.996<br>0.007 | 2.290<br>0.008 | <u>0.0012</u>                  | <u>0.0027</u>                       | 2.64<br>1.14 | 56.92   |
| 30        | 20                                          | 50 |                       | 0.59<br>0.02 | 3.34<br>0.18 | 2.66       | 1.984<br>0.004 | 2.291<br>0.004 | <u>0.0012</u>                  | <u>0.0027</u>                       | 1.25<br>0.60 | 34.81   |
| 30        | 30                                          | 40 |                       | 0.58<br>0.02 | 3.26<br>0.18 | 2.74       | 1.986<br>0.004 | 2.292<br>0.004 | <u>0.0012</u>                  | <u>0.0027</u>                       | 1.24<br>0.62 | 35.83   |
| 30        | 40                                          | 30 |                       | 0.53<br>0.02 | 3.19<br>0.16 | 2.81       | 1.989<br>0.004 | 2.292<br>0.003 | <u>0.0012</u>                  | <u>0.0027</u>                       | 1.34<br>0.54 | 31.16   |
| 30        | 50                                          | 20 |                       | 0.57<br>0.02 | 3.19<br>0.22 | 2.81       | 1.993<br>0.005 | 2.298<br>0.004 | <u>0.0012</u>                  | <u>0.0027</u>                       | 2.46<br>0.73 | 41.19   |

| mol% ChCl | mol% $\text{CrCl}_3 \cdot 6\text{H}_2\text{O}$ | mol% $\text{H}_2\text{O}$ | $S_0^2$             | $N_{\text{O}}$      | $N_{\text{Cl}^-}$ | $R_{\text{O}}$ (Å)    | $R_{\text{Cl}^-}$ (Å) | $\sigma_{\text{O}}^2$ (Å <sup>2</sup> ) | $\sigma_{\text{Cl}^-}^2$ (Å <sup>2</sup> ) | $E_0$ (eV)          | $F$ (%)     |
|-----------|------------------------------------------------|---------------------------|---------------------|---------------------|-------------------|-----------------------|-----------------------|-----------------------------------------|--------------------------------------------|---------------------|-------------|
| 40        | 5                                              | 55                        | 0.64<br>0.03        | 3.41<br>0.21        | 2.59              | 1.987<br>0.005        | 2.285<br>0.004        | <u>0.0012</u>                           | <u>0.0027</u>                              | 0.77<br>0.73        | 39.85       |
| 40        | 10                                             | 50                        | 0.64<br>0.04        | 3.32<br>0.29        | 2.68              | 1.995<br>0.006        | 2.296<br>0.006        | <u>0.0012</u>                           | <u>0.0027</u>                              | 2.40<br>0.96        | 50.87       |
| 40        | 20                                             | 40                        | 0.58<br>0.02        | 3.19<br>0.16        | 2.81              | 1.990<br>0.004        | 2.292<br>0.003        | <u>0.0012</u>                           | <u>0.0027</u>                              | 1.40<br>0.57        | 32.82       |
| 40        | 30                                             | 30                        | 0.59<br>0.02        | 3.24<br>0.18        | 2.76              | 1.990<br>0.004        | 2.293<br>0.004        | <u>0.0012</u>                           | <u>0.0027</u>                              | 1.14<br>0.61        | 35.05       |
| 40        | 40                                             | 20                        | 0.55<br>0.02        | 3.09<br>0.17        | 2.91              | 1.989<br>0.004        | 2.295<br>0.003        | <u>0.0012</u>                           | <u>0.0027</u>                              | 1.48<br>0.61        | 35.05       |
| 40        | 50                                             | 10                        | 0.58<br>0.03        | 3.03<br>0.23        | 2.97              | 1.987<br>0.005        | 2.295<br>0.004        | <u>0.0012</u>                           | <u>0.0027</u>                              | 1.81<br>0.79        | 43.7        |
| 40        | 60                                             | 0                         | 0.56<br>0.03        | 3.16<br>0.23        | 2.84              | 1.998<br>0.006        | 2.297<br>0.005        | <u>0.0012</u>                           | <u>0.0027</u>                              | 2.27<br>0.80        | 43.6        |
| 50        | 5                                              | 45                        | 0.65<br>0.02        | 2.80<br>0.20        | 3.20              | 2.001<br>0.006        | 2.302<br>0.004        | <u>0.0012</u>                           | <u>0.0027</u>                              | 2.22<br>0.73        | 39.74       |
| 50        | 10                                             | 40                        | 0.63<br>0.02        | 3.22<br>0.19        | 2.78              | 2.001<br>0.005        | 2.300<br>0.004        | <u>0.0012</u>                           | <u>0.0027</u>                              | 1.67<br>0.67        | 37.69       |
| <b>50</b> | <b>20</b>                                      | <b>30</b>                 | <b>0.58</b><br>0.03 | <b>3.03</b><br>0.18 | <b>2.97</b>       | <b>1.993</b><br>0.004 | <b>2.293</b><br>0.004 | <b>0.0012</b><br>0.0005                 | <b>0.0027</b><br>0.0004                    | <b>1.25</b><br>0.61 | <b>32.8</b> |
| 50        | 30                                             | 20                        | 0.58<br>0.02        | 3.01<br>0.18        | 2.99              | 1.996<br>0.005        | 2.297<br>0.004        | <u>0.0012</u>                           | <u>0.0027</u>                              | 1.70<br>0.65        | 36.68       |
| 50        | 40                                             | 10                        | 0.56<br>0.02        | 2.99<br>0.17        | 3.01              | 1.992<br>0.004        | 2.297<br>0.003        | <u>0.0012</u>                           | <u>0.0027</u>                              | 1.63<br>0.62        | 35          |
| 50        | 50                                             | 0                         | 0.57<br>0.02        | 3.05<br>0.18        | 2.95              | 1.992<br>0.004        | 2.298<br>0.004        | <u>0.0012</u>                           | <u>0.0027</u>                              | 1.52<br>0.64        | 36.32       |
| 60        | 20                                             | 20                        | 0.58<br>0.02        | 2.90<br>0.18        | 3.10              | 2.010<br>0.005        | 2.303<br>0.004        | <u>0.0012</u>                           | <u>0.0027</u>                              | 2.33<br>0.65        | 35.27       |
| 60        | 30                                             | 10                        | 0.58<br>0.02        | 3.02<br>0.17        | 2.98              | 1.997<br>0.004        | 2.299<br>0.003        | <u>0.0012</u>                           | <u>0.0027</u>                              | 1.65<br>0.60        | 34.22       |
| 60        | 40                                             | 0                         | 0.57<br>0.03        | 3.04<br>0.25        | 2.96              | 2.010<br>0.007        | 2.303<br>0.005        | <u>0.0012</u>                           | <u>0.0027</u>                              | 3.08<br>0.88        | 46.4        |
| 70        | 20                                             | 10                        | 0.60<br>0.02        | 2.87<br>0.16        | 3.13              | 2.009<br>0.005        | 2.304<br>0.003        | <u>0.0012</u>                           | <u>0.0027</u>                              | 1.92<br>0.59        | 32.6        |
| 70        | 30                                             | 0                         | 0.57<br>0.02        | 2.97<br>0.19        | 3.03              | 2.006<br>0.005        | 2.302<br>0.004        | <u>0.0012</u>                           | <u>0.0027</u>                              | 1.80<br>0.70        | 38.35       |

**Table S2:** The corresponding Pearson's r values for each of the correlations in fig. S1 are presented.

|                                          | $\rho$ (g/cm <sup>3</sup> ) | $A_1$   | $A_1/A_2$ | $\sigma$ (mS/cm) | $c_{\text{Cl}^-, \text{complex}}$ (mol/L) | $WN_{\widehat{HOH}}$ (cm <sup>-1</sup> ) |
|------------------------------------------|-----------------------------|---------|-----------|------------------|-------------------------------------------|------------------------------------------|
| $c_{\text{Cr}^{3+}}$                     | 0.9868                      | 0.9307  | -0.1115   | -0.2018          | 0.8951                                    | -0.9857                                  |
| $c_{\text{Ch}^+}$                        | -0.4193                     | -0.2302 | 0.8044    | -0.6448          | -0.1385                                   | 0.5845                                   |
| $c_{\text{Cl}^-, \text{tot}}$            | 0.9289                      | 0.9767  | 0.3559    | -0.6347          | 0.9898                                    | -0.7627                                  |
| $c_{\text{Cl}^-, \text{complex}}$        | 0.9468                      | 0.9952  | 0.2965    | -0.5371          | 1.0000                                    | -0.8183                                  |
| $c_{\text{Cl}^-, \text{free}}$           | -0.8678                     | -0.9110 | -0.0617   | 0.1443           | -0.8883                                   | 0.8414                                   |
| $c_{\text{H}_2\text{O}, \text{tot}}$     | 0.1892                      | -0.0115 | -0.8760   | 0.7867           | -0.1049                                   | -0.4133                                  |
| $c_{\text{H}_2\text{O}, \text{added}}$   | -0.4388                     | -0.6064 | -0.8173   | 0.9269           | -0.6784                                   | 0.1217                                   |
| $c_{\text{H}_2\text{O}, \text{complex}}$ | 0.8436                      | 0.7025  | -0.4631   | 0.1406           | 0.6365                                    | -0.9069                                  |
| $c_{\text{H}_2\text{O}, \text{free}}$    | -0.1479                     | -0.3348 | -0.8855   | 0.9208           | -0.4216                                   | -0.1399                                  |
| $N_{\text{H}_2\text{O}}$                 | -0.3029                     | -0.4004 | -0.9209   | 0.8625           | -0.5564                                   | -0.0664                                  |
| $c_{\text{Cl}^-}/c_{\text{H}_2\text{O}}$ | 0.1292                      | 0.2102  | 0.9914    | -0.7169          | 0.3892                                    | -0.1300                                  |
| $x_{\text{H}_2\text{O}, \text{added}}$   | -0.5354                     | -0.6698 | -0.7484   | 0.6757           | -0.7588                                   | 0.4072                                   |

**Table S3:** An overview the 37 different sample compositions of the DES-water mixtures is given in the first three columns. The remaining five columns indicate which techniques were used on these samples.

| mol% $\text{CrCl}_3 \cdot 6\text{H}_2\text{O}$ | mol% ChCl | mol% $\text{H}_2\text{O}$ | Density | UV/Vis | EXAFS | Conductivity | ATR-FTIR |
|------------------------------------------------|-----------|---------------------------|---------|--------|-------|--------------|----------|
| 0                                              | 0         | 100                       | x       |        |       | x            | x        |
| 0                                              | 10        | 90                        | x       |        |       | x            | x        |
| 0                                              | 20        | 80                        | x       |        |       | x            | x        |
| 0                                              | 30        | 70                        | x       |        |       | x            | x        |
| 5                                              | 0         | 95                        | x       | x      | x     | x            | x        |
| 5                                              | 10        | 85                        | x       | x      | x     | x            | x        |
| 5                                              | 20        | 75                        | x       | x      | x     | x            | x        |
| 5                                              | 30        | 65                        | x       | x      | x     | x            | x        |
| 5                                              | 40        | 55                        | x       | x      | x     | x            | x        |
| 5                                              | 50        | 45                        |         | x      | x     |              | x        |
| 10                                             | 0         | 90                        | x       | x      | x     | x            | x        |
| 10                                             | 10        | 80                        | x       | x      | x     | x            | x        |
| 10                                             | 20        | 70                        | x       | x      | x     | x            | x        |
| 10                                             | 30        | 60                        | x       | x      | x     | x            | x        |
| 10                                             | 40        | 50                        | x       | x      | x     | x            | x        |
| 10                                             | 50        | 40                        | x       | x      | x     | x            | x        |
| 20                                             | 10        | 70                        | x       | x      | x     | x            | x        |
| 20                                             | 20        | 60                        | x       | x      | x     | x            | x        |
| 20                                             | 30        | 50                        | x       | x      | x     | x            | x        |
| 20                                             | 40        | 40                        | x       | x      | x     | x            | x        |
| 20                                             | 50        | 30                        | x       | x      | x     | x            | x        |
| 20                                             | 60        | 20                        | x       | x      | x     | x            | x        |
| 20                                             | 70        | 10                        | x       | x      | x     | x            | x        |
| 30                                             | 20        | 50                        |         | x      | x     | x            | x        |
| 30                                             | 30        | 40                        | x       | x      | x     | x            | x        |
| 30                                             | 40        | 30                        | x       | x      | x     | x            | x        |
| 30                                             | 50        | 20                        | x       | x      | x     | x            | x        |
| 30                                             | 60        | 10                        | x       | x      | x     | x            | x        |
| 30                                             | 70        | 0                         | x       | x      | x     | x            | x        |
| 40                                             | 30        | 30                        | x       | x      | x     | x            | x        |
| 40                                             | 40        | 20                        | x       | x      | x     | x            | x        |
| 40                                             | 50        | 10                        | x       | x      | x     | x            | x        |
| 40                                             | 60        | 0                         | x       | x      | x     | x            | x        |
| 50                                             | 30        | 20                        | x       | x      | x     | x            |          |
| 50                                             | 40        | 10                        | x       | x      | x     | x            |          |
| 50                                             | 50        | 0                         | x       | x      | x     | x            | x        |
| 60                                             | 40        | 0                         | x       | x      | x     | x            |          |

### S3 Correction equations for samples outside the boundary conditions

From the second part of the main paper, it is clear that various equations can be used to calculate a large range of concentrations of important components in the DES-water mixtures. However, for samples outside the boundary conditions (red stars and triangles), the calculations appear to be less reliable. Fortunately, some corrections can be applied in order to improve the accuracy of the calculations for these less concentrated samples. It should be clear that these corrections are only necessary for samples which are outside the boundary conditions.

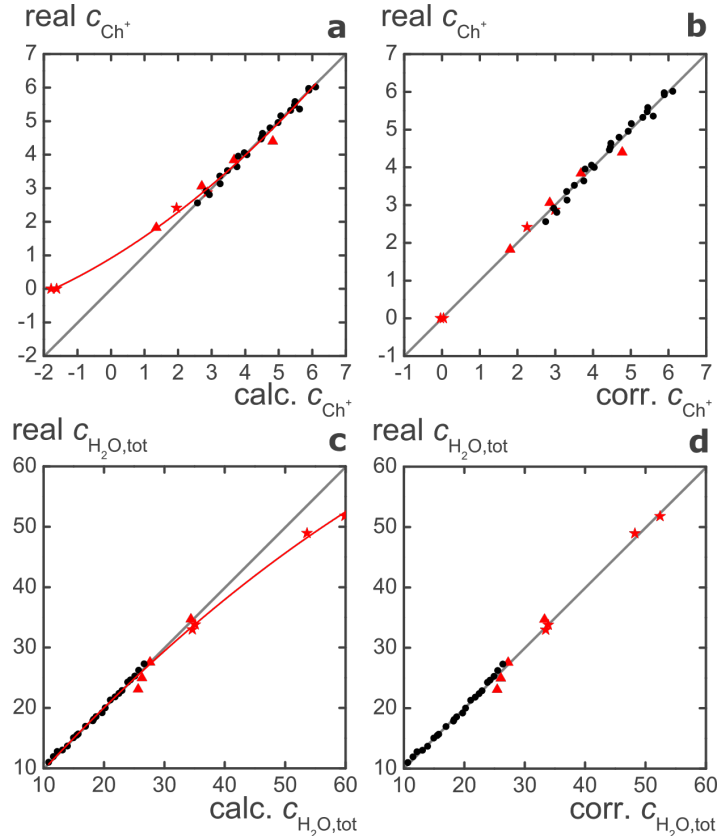

**Figure S11:** In (a) and (c), polynomial fits were used to correct for the deviations from linearity for the compositions outside the boundary conditions. The adjusted  $R^2$ -values were 0.99109 (a) and 0.995 (c). In this way, corrected equations are obtained for  $c_{\text{Ch}^+}$  and  $c_{\text{H}_2\text{O,tot}}$ . The corrected concentrations are compared with the real values in (b) and (d) respectively. All concentrations are given in mol/L.

A correction function is obtained in order to improve the accuracy of  $c_{\text{Ch}^+}$  for the diluted conditions. This was done by fitting a polynomial through the data points representing the real concentration of the choline cation as a function of the calculated concentration (fig. S11a):

$$c_{\text{Ch}^+}^{\text{corrected}}(\text{mol/L}) = 0.04026c_{\text{Ch}^+}^2 + 0.60616c_{\text{Ch}^+} + 0.91528 \quad (\text{S1})$$

As can be seen in fig. S11b, strongly improved results for the stars and triangles are obtained in comparison with the uncorrected calculation (fig. 13g in the main paper). However, it should still be kept in mind that this equation can only be used for standard DES-water mixtures and not for electrolytes during or after electroplating.

In addition, the deviation present in the calculation of  $c_{\text{H}_2\text{O,tot}}$  (fig. 9h in the main paper) can again be corrected for by a second order polynomial:

$$c_{\text{H}_2\text{O,tot}}^{\text{corrected}}(\text{mol/L}) = -0.00426c_{\text{H}_2\text{O,tot}}^2 + 1.15224c_{\text{H}_2\text{O,tot}} - 1.31469 \quad (\text{S2})$$

Which is illustrated in fig. S11c. These improved results cannot only be used for the calculation of  $c_{\text{H}_2\text{O,tot}}$ , but also to improve the calculations of most of the concentrations that were described above.

Firstly, a corrected function of the concentration of coordinating water ligands can be obtained by subtracting the con-



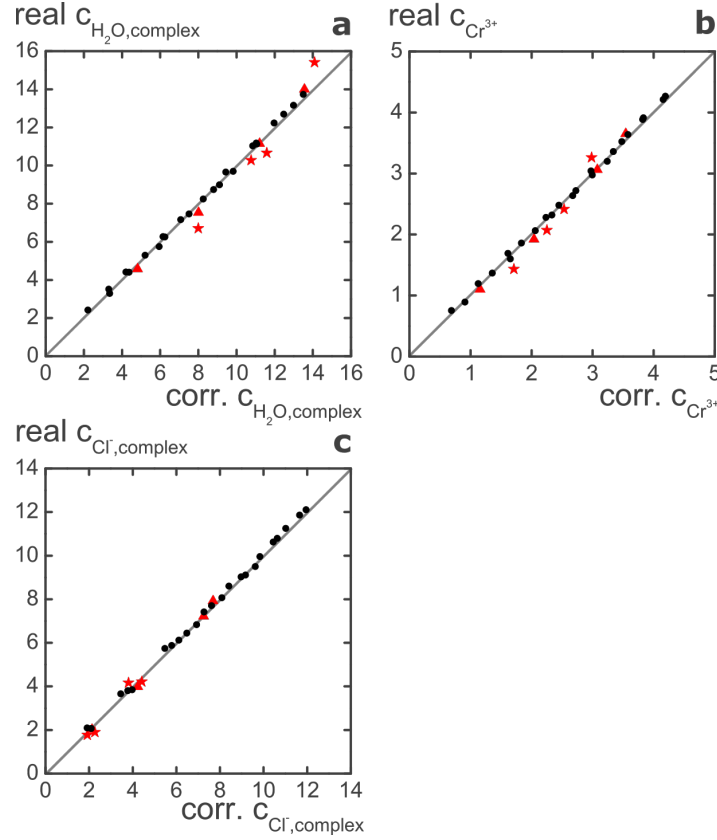

**Figure S12:** The corrections obtained in fig. S11 and eq. S1 and S2, can also be used to construct improved equations for (a)  $c_{\text{H}_2\text{O},\text{complex}}$  (eq. S3), (b)  $c_{\text{Cr}^{3+}}$  (eq. S4), and (c)  $c_{\text{Cl}^-,\text{complex}}$  (eq. S5). All concentrations are in mol/L. Comparison of (a), (b), and (c) with fig. 11d, c, and b (main paper) respectively, shows that large improvements can be made for the DES-water compositions outside the boundary conditions, when using the corrected equations.

centration of ‘free’ water  $c_{\text{H}_2\text{O},\text{free}}$  from the corrected concentration of the total water  $c_{\text{H}_2\text{O},\text{tot}}^{\text{corrected}}$ :

$$\begin{aligned} c_{\text{H}_2\text{O},\text{complex}}^{\text{corrected}}(\text{mol/L}) &= c_{\text{H}_2\text{O},\text{tot}}^{\text{corrected}} - c_{\text{H}_2\text{O},\text{free}} \\ &= c_{\text{H}_2\text{O},\text{tot}}^{\text{corrected}} - \frac{1}{0.1119 \left( \frac{A_1}{A_2} \right)^2 - 0.15181} \end{aligned} \quad (\text{S3})$$

$c_{\text{H}_2\text{O},\text{complex}}^{\text{corrected}}$  is compared with the real concentration of coordinating water in fig. S12a.

It was not necessary to find a corrected function for  $c_{\text{H}_2\text{O},\text{free}}$ , because good results can already be obtained for all data points by eq. 14 (main paper). Additionally, corrected functions for the concentration of Cr(III)  $c_{\text{Cr}^{3+}}^{\text{corrected}}$  and the concentration of coordinating chloride anions  $c_{\text{Cl}^-,\text{complex}}^{\text{corrected}}$  can be obtained in a similar fashion:

$$\begin{aligned} c_{\text{Cr}^{3+}}^{\text{corrected}}(\text{mol/L}) &= \frac{c_{\text{H}_2\text{O},\text{complex}}^{\text{corrected}}}{N_{\text{H}_2\text{O}}} \\ &= \frac{c_{\text{H}_2\text{O},\text{tot}}^{\text{corrected}} - \frac{1}{0.1119 \left( \frac{A_1}{A_2} \right)^2 - 0.15181}}{-0.0470\lambda_1 + 25.2155} \end{aligned} \quad (\text{S4})$$

$$\begin{aligned} c_{\text{Cl}^-,\text{complex}}^{\text{corrected}}(\text{mol/L}) &= c_{\text{Cr}^{3+}}^{\text{corrected}} \cdot N_{\text{Cl}^-} \\ &= \left( \frac{0.0470\lambda_1 - 19.2155}{-0.0470\lambda_1 + 25.2155} \right) \cdot \left( c_{\text{H}_2\text{O},\text{tot}}^{\text{corrected}} - \frac{1}{0.1119 \left( \frac{A_1}{A_2} \right)^2 - 0.15181} \right) \end{aligned} \quad (\text{S5})$$

These corrected concentrations are validated with respect to the real values in fig. S12b and c. When comparing fig. S12a, b and c to the corresponding plots in fig. 11d, c, and b (main paper) respectively, it is observed that the corrected

equations result in major improvements for the compositions represented by the red stars and triangles.

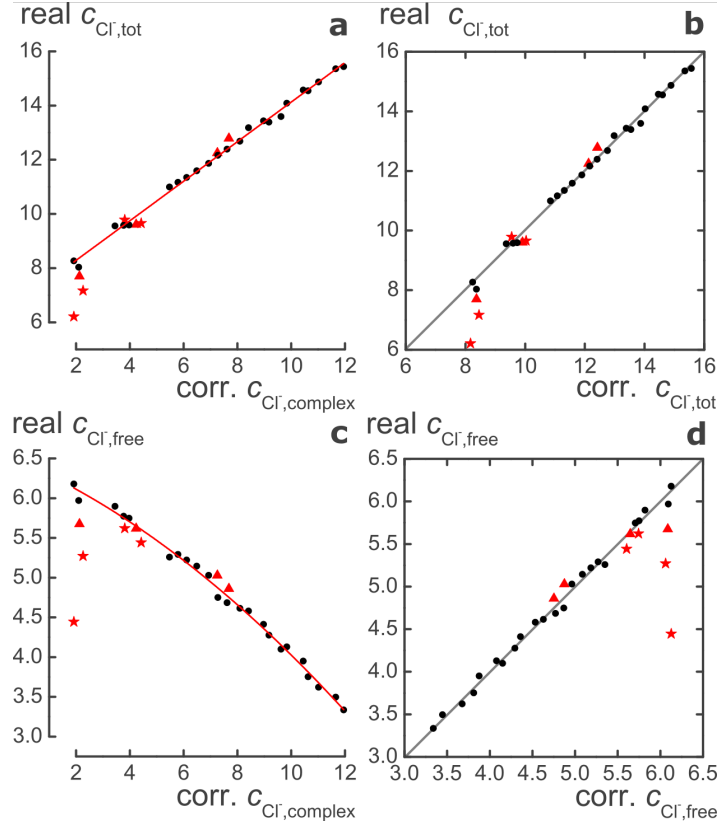

**Figure S13:** The corrections obtained in fig. S13 and eq. S1 and S2, can also be used to construct improved equations, based on the corrected concentration of coordinating chlorides. In (a), the fit for  $c_{\text{Cl}^{-},\text{tot}}$  was based on the compositions within the boundary conditions and resulted in an adjusted  $R^2$  of 0.99614 (eq. S6). Similarly, in the case of  $c_{\text{Cl}^{-},\text{free}}$ , the polynomial fit with the compositions within the boundary conditions, resulted in eq. S7 and an adjusted  $R^2$ -value of 0.9936. The corresponding plots which compare the real concentrations with the calculated values after correction, are shown in (b) and (d). Comparing with fig. 13f and c (main paper), shows that slight improvements can be made for the samples outside the boundary conditions, by using the corrected equations. However, the improvements are much less pronounced than in fig. S12. All concentrations are in mol/L.

Finally, from the correlation plot (fig. S1), it is observed that both  $c_{\text{Cl}^{-},\text{tot}}$  and  $c_{\text{Cl}^{-},\text{free}}$  are correlated reasonably well with  $c_{\text{Cl}^{-},\text{complex}}$ . Hence  $c_{\text{Cl}^{-},\text{tot}}^{\text{corrected}}$  can be used to construct corrected equations for the total and ‘free’ concentration of chlorides. The fits in fig. S13a and c result in the following equations:

$$c_{\text{Cl}^{-},\text{tot}}^{\text{corrected}} (\text{mol/L}) = 0.73008 c_{\text{Cl}^{-},\text{complex}}^{\text{corrected}} + 6.82668$$

$$= 0.73008 \left( \frac{0.0470\lambda_1 - 19.2155}{-0.0470\lambda_1 + 25.2155} \right) \cdot \left( c_{\text{H}_2\text{O},\text{tot}}^{\text{corrected}} - \frac{1}{0.1119 \left( \frac{A_1}{A_2} \right)^2 - 0.15181} \right) + 6.82668 \quad (\text{S6})$$

$$c_{\text{Cl}^{-},\text{free}}^{\text{corrected}} (\text{mol/L}) = -0.00918 \left( c_{\text{Cl}^{-},\text{complex}}^{\text{corrected}} \right)^2 - 0.15065 c_{\text{Cl}^{-},\text{complex}}^{\text{corrected}} + 6.45069 \quad (\text{S7})$$

However, comparing fig. S13b and d with the corresponding uncorrected plots in fig. 13f and d, shows that certainly for  $c_{\text{Cl}^{-},\text{free}}^{\text{corrected}}$ , but also for  $c_{\text{Cl}^{-},\text{tot}}^{\text{corrected}}$ , only minor improvements are made. Hence, one should still be careful using these equations if the compositions are outside the boundary conditions.

## S4 Fitting reports

$$\sigma(\text{mS/cm}) = 0.05686 \cdot c_{\text{H}_2\text{O,added}}^2 \quad (7)$$

### Parameters

|              |    | Value   | Standard Error | t-Value  | Prob> t | Dependency |
|--------------|----|---------|----------------|----------|---------|------------|
| conductivity | B2 | 0.05686 | 0.00117        | 48.80462 | 0       | 0          |

Reduced Chi-sqr = 5.16869001601

COD(R^2) = 0.98502358525775

Iterations Performed = 3

Total Iterations in Session = 3

Fit converged. Chi-Sqr tolerance value of 1E-9 was reached.

Standard Error was scaled with square root of reduced Chi-Sqr.

Some input data points are missing.

### Statistics

|                         | conductivity   |
|-------------------------|----------------|
| Number of Points        | 31             |
| Degrees of Freedom      | 30             |
| Reduced Chi-Sqr         | 5.16869        |
| Residual Sum of Squares | 155.0607       |
| R-Square(COD)           | 0.98502        |
| Adj. R-Square           | 0.98502        |
| Fit Status              | Succeeded(100) |

Fit Status Code :

100 : Fit converged. Chi-Sqr tolerance value of 1E-9 was reached

### Summary

|              | B2      |                | Statistics      |               |
|--------------|---------|----------------|-----------------|---------------|
|              | Value   | Standard Error | Reduced Chi-Sqr | Adj. R-Square |
| conductivity | 0.05686 | 0.00117        | 5.16869         | 0.98502       |

### ANOVA

|              |                   | DF | Sum of Squares | Mean Square | F Value    | Prob>F |
|--------------|-------------------|----|----------------|-------------|------------|--------|
| conductivity | Regression        | 1  | 12311.25649    | 12311.25649 | 2381.89105 | 1      |
|              | Residual          | 30 | 155.0607       | 5.16869     |            |        |
|              | Uncorrected Total | 31 | 12466.31719    |             |            |        |
|              | Corrected Total   | 30 | 10353.65961    |             |            |        |

$$c_{\text{H}_2\text{O,added}}(\text{mol/L}) = 4.19937 \cdot \sqrt{\sigma}$$

(8)

### Parameters

|                           |     | Value   | Standard Error | t-Value  | Prob> t | Dependency |
|---------------------------|-----|---------|----------------|----------|---------|------------|
| c(H <sub>2</sub> O,added) | B12 | 4.19937 | 0.0859         | 48.88577 | 0       | 0          |

Reduced Chi-sqr = 1.88841877965

COD(R<sup>2</sup>) = 0.97904472395244

Iterations Performed = 3

Total Iterations in Session = 3

**Fit converged. Chi-Sqr tolerance value of 1E-9 was reached.**

Standard Error was scaled with square root of reduced Chi-Sqr.

Some input data points are missing.

### Statistics

|                         | c(H <sub>2</sub> O,added) |
|-------------------------|---------------------------|
| Number of Points        | 31                        |
| Degrees of Freedom      | 30                        |
| Reduced Chi-Sqr         | 1.88842                   |
| Residual Sum of Squares | 56.65256                  |
| R-Square(COD)           | 0.97904                   |
| Adj. R-Square           | 0.97904                   |
| Fit Status              | Succeeded(100)            |

Fit Status Code :

100 : Fit converged. Chi-Sqr tolerance value of 1E-9 was reached

### Summary

|                           | B12     |                | Statistics      |               |
|---------------------------|---------|----------------|-----------------|---------------|
|                           | Value   | Standard Error | Reduced Chi-Sqr | Adj. R-Square |
| c(H <sub>2</sub> O,added) | 4.19937 | 0.0859         | 1.88842         | 0.97904       |

### ANOVA

|                           |                   | DF | Sum of Squares | Mean Square | F Value    | Prob>F |
|---------------------------|-------------------|----|----------------|-------------|------------|--------|
| c(H <sub>2</sub> O,added) | Regression        | 1  | 4512.97852     | 4512.97852  | 2389.81871 | 1      |
|                           | Residual          | 30 | 56.65256       | 1.88842     |            |        |
|                           | Uncorrected Total | 31 | 4569.63109     |             |            |        |
|                           | Corrected Total   | 30 | 2703.49879     |             |            |        |

$$\sigma(\text{mS/cm}) = 0.01563 \cdot e^{\frac{x_{\text{H}_2\text{O,added}}}{0.11046}} \quad (9)$$

### Parameters

|              |    | Value   | Standard Error |
|--------------|----|---------|----------------|
| conductivity | y0 | 0       | 0              |
|              | A1 | 0.01563 | 0.00683        |
|              | t1 | 0.11046 | 0.00583        |

Reduced Chi-sqr = 9.13956191713

COD(R^2) = 0.97363442330315

Iterations Performed = 10

Total Iterations in Session = 10

**Fit converged - tolerance criterion satisfied.**

Some parameter values were fixed.

### Statistics

|                         | conductivity   |
|-------------------------|----------------|
| Number of Points        | 32             |
| Degrees of Freedom      | 30             |
| Reduced Chi-Sqr         | 9.13956        |
| Residual Sum of Squares | 274.18686      |
| Adj. R-Square           | 0.97276        |
| Fit Status              | Succeeded(100) |

Fit Status Code :

100 : Fit converged - tolerance criterion satisfied.

### Summary

|              | y0    |                | A1      |                | t1      |                | Statistics      |               |
|--------------|-------|----------------|---------|----------------|---------|----------------|-----------------|---------------|
|              | Value | Standard Error | Value   | Standard Error | Value   | Standard Error | Reduced Chi-Sqr | Adj. R-Square |
| conductivity | 0     | 0              | 0.01563 | 0.00683        | 0.11046 | 0.00583        | 9.13956         | 0.97276       |

### ANOVA

|              |                   | DF | Sum of Squares | Mean Square | F Value   | Prob>F |
|--------------|-------------------|----|----------------|-------------|-----------|--------|
| conductivity | Regression        | 2  | 12194.04026    | 6097.02013  | 667.10201 | 0      |
|              | Residual          | 30 | 274.18686      | 9.13956     |           |        |
|              | Uncorrected Total | 32 | 12468.22711    |             |           |        |
|              | Corrected Total   | 31 | 10399.42576    |             |           |        |

$$x_{\text{H}_2\text{O,added}} = 0.13016 \cdot \ln(\sigma - 0.06899) + 0.40533 \quad (10)$$

### Parameters

|                           |   | Value    | Standard Error |
|---------------------------|---|----------|----------------|
| x(H <sub>2</sub> O,added) | a | 0.40533  | 0.01195        |
|                           | b | -0.13016 | 0.00588        |
|                           | c | -0.06899 | 0.01312        |

Reduced Chi-sqr = 0.00253753504493

COD(R^2) = 0.97172306419271

Iterations Performed = 8

Total Iterations in Session = 8

Fit converged - tolerance criterion satisfied.

### Statistics

|                         | x(H <sub>2</sub> O,added) |
|-------------------------|---------------------------|
| Number of Points        | 32                        |
| Degrees of Freedom      | 29                        |
| Reduced Chi-Sqr         | 0.00254                   |
| Residual Sum of Squares | 0.07359                   |
| Adj. R-Square           | 0.96977                   |
| Fit Status              | Succeeded(100)            |

Fit Status Code :

100 : Fit converged - tolerance criterion satisfied.

### Summary

|                           | a       |                | b        |                | c        |                | Statistics      |               |
|---------------------------|---------|----------------|----------|----------------|----------|----------------|-----------------|---------------|
|                           | Value   | Standard Error | Value    | Standard Error | Value    | Standard Error | Reduced Chi-Sqr | Adj. R-Square |
| x(H <sub>2</sub> O,added) | 0.40533 | 0.01195        | -0.13016 | 0.00588        | -0.06899 | 0.01312        | 0.00254         | 0.96977       |

### ANOVA

|                           |                   | DF | Sum of Squares | Mean Square | F Value    | Prob>F |
|---------------------------|-------------------|----|----------------|-------------|------------|--------|
| x(H <sub>2</sub> O,added) | Regression        | 3  | 7.68891        | 2.56297     | 1010.02368 | 0      |
|                           | Residual          | 29 | 0.07359        | 0.00254     |            |        |
|                           | Uncorrected Total | 32 | 7.7625         |             |            |        |
|                           | Corrected Total   | 31 | 2.60242        |             |            |        |

$$c_{\text{Cl}^-, \text{complex}}(\text{mol/L}) = 8.53001A_1 - 0.20756 \quad (11)$$

### Parameters

|                             |           | Value    | Standard Error | t-Value   | Prob> t    |
|-----------------------------|-----------|----------|----------------|-----------|------------|
| c(Cl <sup>-</sup> ,complex) | Intercept | -0.20756 | 0.04842        | -4.28653  | 3.27471E-4 |
|                             | Slope     | 8.53001  | 0.05004        | 170.44891 | 0          |

Slope is significantly different from zero (See ANOVA Table).

Standard Error was scaled with square root of reduced Chi-Sqr.

Some input data points are missing.

### Statistics

|                         | c(Cl <sup>-</sup> ,complex) |
|-------------------------|-----------------------------|
| Number of Points        | 23                          |
| Degrees of Freedom      | 21                          |
| Residual Sum of Squares | 0.14532                     |
| Pearson's r             | 0.99964                     |
| R-Square(COD)           | 0.99928                     |
| Adj. R-Square           | 0.99924                     |

### Summary

|                             | Intercept |                | Slope   |                | Statistics    |
|-----------------------------|-----------|----------------|---------|----------------|---------------|
|                             | Value     | Standard Error | Value   | Standard Error | Adj. R-Square |
| c(Cl <sup>-</sup> ,complex) | -0.20756  | 0.04842        | 8.53001 | 0.05004        | 0.99924       |

### ANOVA

|                             |       | DF | Sum of Squares | Mean Square | F Value     | Prob>F |
|-----------------------------|-------|----|----------------|-------------|-------------|--------|
| c(Cl <sup>-</sup> ,complex) | Model | 1  | 201.04633      | 201.04633   | 29052.83121 | 0      |
|                             | Error | 21 | 0.14532        | 0.00692     |             |        |
|                             | Total | 22 | 201.19165      |             |             |        |

At the 0.05 level, the slope is significantly different from zero.

$$c_{\text{H}_2\text{O,free}}(\text{mol/L}) = \frac{1}{0.1119 \left( \frac{A_1}{A_2} \right)^2 - 0.15181} \quad (14)$$

### Parameters

|                          |    | Value    | Standard Error | t-Value  | Prob> t | Dependency |
|--------------------------|----|----------|----------------|----------|---------|------------|
| c(H <sub>2</sub> O,free) | B0 | -0.15181 | 0.00265        | -57.3112 | 0       | 0.99214    |
|                          | B2 | 0.1119   | 0.00159        | 70.18962 | 0       | 0.99214    |

Reduced Chi-sqr = 0.300662808121

COD(R<sup>2</sup>) = 0.99508689641663

Iterations Performed = 15

Total Iterations in Session = 15

Fit converged. Chi-Sqr tolerance value of 1E-9 was reached.

Standard Error was scaled with square root of reduced Chi-Sqr.

Some input data points are missing.

### Statistics

|                         | c(H <sub>2</sub> O,free) |
|-------------------------|--------------------------|
| Number of Points        | 31                       |
| Degrees of Freedom      | 29                       |
| Reduced Chi-Sqr         | 0.30066                  |
| Residual Sum of Squares | 8.71922                  |
| R-Square(COD)           | 0.99509                  |
| Adj. R-Square           | 0.99492                  |
| Fit Status              | Succeeded(100)           |

Fit Status Code :

100 : Fit converged. Chi-Sqr tolerance value of 1E-9 was reached

### Summary

|                          | B0       |                | B2     |                | Statistics      |               |
|--------------------------|----------|----------------|--------|----------------|-----------------|---------------|
|                          | Value    | Standard Error | Value  | Standard Error | Reduced Chi-Sqr | Adj. R-Square |
| c(H <sub>2</sub> O,free) | -0.15181 | 0.00265        | 0.1119 | 0.00159        | 0.30066         | 0.99492       |

### ANOVA

|                          |                   | DF | Sum of Squares | Mean Square | F Value     | Prob>F |
|--------------------------|-------------------|----|----------------|-------------|-------------|--------|
| c(H <sub>2</sub> O,free) | Regression        | 2  | 8187.74581     | 4093.87291  | 13616.16001 | 0      |
|                          | Residual          | 29 | 8.71922        | 0.30066     |             |        |
|                          | Uncorrected Total | 31 | 8196.46503     |             |             |        |
|                          | Corrected Total   | 30 | 1774.68708     |             |             |        |



$$c_{\text{Cl}^-, \text{free}}(\text{mol/L}) = -0.56302A_1^2 - 1.39223A_1 + 6.53267 \quad (15)$$

### Parameters

|                          |           | Value    | Standard Error | t-Value  | Prob> t    |
|--------------------------|-----------|----------|----------------|----------|------------|
| c(Cl <sup>-</sup> ,free) | Intercept | 6.53267  | 0.09112        | 71.69115 | 0          |
|                          | B1        | -1.39223 | 0.22818        | -6.10146 | 5.80127E-6 |
|                          | B2        | -0.56302 | 0.13048        | -4.3151  | 3.3677E-4  |

Standard Error was scaled with square root of reduced Chi-Sqr.  
Some input data points are missing.

### Statistics

|                         | c(Cl <sup>-</sup> ,free) |
|-------------------------|--------------------------|
| Number of Points        | 23                       |
| Degrees of Freedom      | 20                       |
| Residual Sum of Squares | 0.11361                  |
| R-Square(COD)           | 0.9927                   |
| Adj. R-Square           | 0.99197                  |

### Summary

|                          | Intercept |                | B1       |                | B2       |                | Statistics    |
|--------------------------|-----------|----------------|----------|----------------|----------|----------------|---------------|
|                          | Value     | Standard Error | Value    | Standard Error | Value    | Standard Error | Adj. R-Square |
| c(Cl <sup>-</sup> ,free) | 6.53267   | 0.09112        | -1.39223 | 0.22818        | -0.56302 | 0.13048        | 0.99197       |

### ANOVA

|                          |       | DF | Sum of Squares | Mean Square | F Value    | Prob>F |
|--------------------------|-------|----|----------------|-------------|------------|--------|
| c(Cl <sup>-</sup> ,free) | Model | 2  | 15.45891       | 7.72945     | 1360.70308 | 0      |
|                          | Error | 20 | 0.11361        | 0.00568     |            |        |
|                          | Total | 22 | 15.57252       |             |            |        |

$$c_{\text{Cl}^-, \text{tot}}(\text{mol/L}) = 6.17279A_1 + 6.66974$$

(16)

### Parameters

|                          |           | Value   | Standard Error | t-Value  | Prob> t |
|--------------------------|-----------|---------|----------------|----------|---------|
| c(Cl <sup>-</sup> , tot) | Intercept | 6.66974 | 0.06915        | 96.4546  | 0       |
|                          | Slope     | 6.17279 | 0.07147        | 86.37395 | 0       |

Slope is significantly different from zero (See ANOVA Table).

Standard Error was scaled with square root of reduced Chi-Sqr.

Some input data points are missing.

### Statistics

|                         | c(Cl <sup>-</sup> , tot) |
|-------------------------|--------------------------|
| Number of Points        | 23                       |
| Degrees of Freedom      | 21                       |
| Residual Sum of Squares | 0.29636                  |
| Pearson's r             | 0.9986                   |
| R-Square(COD)           | 0.99719                  |
| Adj. R-Square           | 0.99706                  |

### Summary

|                          | Intercept |                | Slope   |                | Statistics    |
|--------------------------|-----------|----------------|---------|----------------|---------------|
|                          | Value     | Standard Error | Value   | Standard Error | Adj. R-Square |
| c(Cl <sup>-</sup> , tot) | 6.66974   | 0.06915        | 6.17279 | 0.07147        | 0.99706       |

### ANOVA

|                          |       | DF | Sum of Squares | Mean Square | F Value    | Prob>F |
|--------------------------|-------|----|----------------|-------------|------------|--------|
| c(Cl <sup>-</sup> , tot) | Model | 1  | 105.28347      | 105.28347   | 7460.45956 | 0      |
|                          | Error | 21 | 0.29636        | 0.01411     |            |        |
|                          | Total | 22 | 105.57982      |             |            |        |

At the 0.05 level, the slope is significantly different from zero.

$$c_{\text{Ch}^+}^{\text{corrected}}(\text{mol/L}) = 0.04026c_{\text{Ch}^+}^2 - 0.60616c_{\text{Ch}^+} + 0.91528 \quad (\text{S1})$$

### Parameters

|             |           | Value   | Standard Error | t-Value  | Prob> t     |
|-------------|-----------|---------|----------------|----------|-------------|
| real c(Ch+) | Intercept | 0.91528 | 0.0586         | 15.61872 | 2.44249E-15 |
|             | B1        | 0.60616 | 0.02853        | 21.24619 | 0           |
|             | B2        | 0.04026 | 0.00514        | 7.84009  | 1.53654E-8  |

Standard Error was scaled with square root of reduced Chi-Sqr.  
Some input data points are missing.

### Statistics

|                         | real c(Ch+) |
|-------------------------|-------------|
| Number of Points        | 31          |
| Degrees of Freedom      | 28          |
| Residual Sum of Squares | 0.59103     |
| R-Square(COD)           | 0.99168     |
| Adj. R-Square           | 0.99109     |

### Summary

|             | Intercept |                | B1      |                | B2      |                | Statistics    |
|-------------|-----------|----------------|---------|----------------|---------|----------------|---------------|
|             | Value     | Standard Error | Value   | Standard Error | Value   | Standard Error | Adj. R-Square |
| real c(Ch+) | 0.91528   | 0.0586         | 0.60616 | 0.02853        | 0.04026 | 0.00514        | 0.99109       |

### ANOVA

|             |       | DF | Sum of Squares | Mean Square | F Value    | Prob>F |
|-------------|-------|----|----------------|-------------|------------|--------|
| real c(Ch+) | Model | 2  | 70.46356       | 35.23178    | 1669.10977 | 0      |
|             | Error | 28 | 0.59103        | 0.02111     |            |        |
|             | Total | 30 | 71.05459       |             |            |        |

$$c_{\text{H}_2\text{O,tot}}^{\text{corrected}} (\text{mol/L}) = -0.00426c_{\text{H}_2\text{O,tot}}^2 + 1.15224c_{\text{H}_2\text{O,tot}} - 1.31469 \quad (\text{S2})$$

### Parameters

|                              |           | Value    | Standard Error | t-Value  | Prob> t    |
|------------------------------|-----------|----------|----------------|----------|------------|
| real c(H <sub>2</sub> O,tot) | Intercept | -1.31469 | 0.68774        | -1.91161 | 0.06621    |
|                              | B1        | 1.15224  | 0.04769        | 24.16114 | 0          |
|                              | B2        | -0.00426 | 6.98998E-4     | -6.10049 | 1.39711E-6 |

Standard Error was scaled with square root of reduced Chi-Sqr.  
Some input data points are missing.

### Statistics

|                         | real c(H <sub>2</sub> O,tot) |
|-------------------------|------------------------------|
| Number of Points        | 31                           |
| Degrees of Freedom      | 28                           |
| Residual Sum of Squares | 12.97022                     |
| R-Square(COD)           | 0.99534                      |
| Adj. R-Square           | 0.995                        |

### Summary

|                              | Intercept |                | B1      |                | B2       |                | Statistics    |
|------------------------------|-----------|----------------|---------|----------------|----------|----------------|---------------|
|                              | Value     | Standard Error | Value   | Standard Error | Value    | Standard Error | Adj. R-Square |
| real c(H <sub>2</sub> O,tot) | -1.31469  | 0.68774        | 1.15224 | 0.04769        | -0.00426 | 6.98998E-4     | 0.995         |

### ANOVA

|                              |       | DF | Sum of Squares | Mean Square | F Value    | Prob>F |
|------------------------------|-------|----|----------------|-------------|------------|--------|
| real c(H <sub>2</sub> O,tot) | Model | 2  | 2768.41906     | 1384.20953  | 2988.21895 | 0      |
|                              | Error | 28 | 12.97022       | 0.46322     |            |        |
|                              | Total | 30 | 2781.38929     |             |            |        |

$$c_{\text{Cl}^-, \text{tot}}^{\text{corrected}} (\text{mol/L}) = 0.73008 c_{\text{Cl}^-, \text{tot}} + 6.82668$$

$$= 0.73008 \left( \frac{0.0470\lambda_1 - 19.2155}{-0.0470\lambda_1 + 25.2155} \right) \cdot \left( c_{\text{H}_2\text{O}, \text{tot}}^{\text{corrected}} - \frac{1}{0.1119 \left( \frac{A_1}{A_2} \right)^2 - 0.15181} \right) + 6.82668 \quad (\text{S6})$$

## Parameters

|                          |           | Value   | Standard Error | t-Value  | Prob> t |
|--------------------------|-----------|---------|----------------|----------|---------|
| c(Cl <sup>-</sup> , tot) | Intercept | 6.82668 | 0.07733        | 88.27766 | 0       |
|                          | Slope     | 0.73008 | 0.00969        | 75.3385  | 0       |

Slope is significantly different from zero (See ANOVA Table).

Standard Error was scaled with square root of reduced Chi-Sqr.

Some input data points are missing.

## Statistics

|                         | c(Cl <sup>-</sup> , tot) |
|-------------------------|--------------------------|
| Number of Points        | 23                       |
| Degrees of Freedom      | 21                       |
| Residual Sum of Squares | 0.38919                  |
| Pearson's r             | 0.99816                  |
| R-Square(COD)           | 0.99631                  |
| Adj. R-Square           | 0.99614                  |

## Summary

|                          | Intercept |                | Slope   |                | Statistics    |
|--------------------------|-----------|----------------|---------|----------------|---------------|
|                          | Value     | Standard Error | Value   | Standard Error | Adj. R-Square |
| c(Cl <sup>-</sup> , tot) | 6.82668   | 0.07733        | 0.73008 | 0.00969        | 0.99614       |

## ANOVA

|                          |       | DF | Sum of Squares | Mean Square | F Value    | Prob>F |
|--------------------------|-------|----|----------------|-------------|------------|--------|
| c(Cl <sup>-</sup> , tot) | Model | 1  | 105.19063      | 105.19063   | 5675.89023 | 0      |
|                          | Error | 21 | 0.38919        | 0.01853     |            |        |
|                          | Total | 22 | 105.57982      |             |            |        |

At the 0.05 level, the slope is significantly different from zero.

$$c_{\text{Cl}^-, \text{free}}^{\text{corrected}} (\text{mol/L}) = -0.00918 \left( c_{\text{Cl}^-, \text{complex}}^{\text{corrected}} \right)^2 - 0.15065 c_{\text{Cl}^-, \text{complex}}^{\text{corrected}} + 6.45069 \quad (\text{S7})$$

### Parameters

|                           |           | Value    | Standard Error | t-Value  | Prob> t    |
|---------------------------|-----------|----------|----------------|----------|------------|
| c(Cl <sup>-</sup> , free) | Intercept | 6.45069  | 0.07666        | 84.15179 | 0          |
|                           | B1        | -0.15065 | 0.0237         | -6.35714 | 3.33399E-6 |
|                           | B2        | -0.00918 | 0.00166        | -5.5235  | 2.08887E-5 |

Standard Error was scaled with square root of reduced Chi-Sqr.  
Some input data points are missing.

### Statistics

|                         | c(Cl <sup>-</sup> , free) |
|-------------------------|---------------------------|
| Number of Points        | 23                        |
| Degrees of Freedom      | 20                        |
| Residual Sum of Squares | 0.09065                   |
| R-Square(COD)           | 0.99418                   |
| Adj. R-Square           | 0.9936                    |

### Summary

|                           | Intercept |                | B1       |                | B2       |                | Statistics    |
|---------------------------|-----------|----------------|----------|----------------|----------|----------------|---------------|
|                           | Value     | Standard Error | Value    | Standard Error | Value    | Standard Error | Adj. R-Square |
| c(Cl <sup>-</sup> , free) | 6.45069   | 0.07666        | -0.15065 | 0.0237         | -0.00918 | 0.00166        | 0.9936        |

### ANOVA

|                           |       | DF | Sum of Squares | Mean Square | F Value    | Prob>F |
|---------------------------|-------|----|----------------|-------------|------------|--------|
| c(Cl <sup>-</sup> , free) | Model | 2  | 15.48187       | 7.74093     | 1707.92007 | 0      |
|                           | Error | 20 | 0.09065        | 0.00453     |            |        |
|                           | Total | 22 | 15.57252       |             |            |        |
